# Supplementary material
Source: publisher figshare collection journal article supplement (https://acs.figshare.com/ndownloader/files/14174243)
Supplement: Supplementary file 1 [file 14174243]

# SUPPORTING INFORMATION

## A solvent regulation approach for preparing cellulose nanocrystal-reinforced regenerated cellulose fibers and their properties

*Zeming Jiang<sup>†</sup>, Lan Tang<sup>†</sup>, Xin Gao<sup>†</sup>, Wentao Zhang<sup>†</sup>, Jiwei Ma<sup>†</sup>, and Liping Zhang<sup>\*†</sup>*

*<sup>†</sup>Beijing Key Laboratory of Lignocellulosic Chemistry, Beijing Forestry University, MOE Engineering Research Center of Forestry Biomass Materials and Bioenergy, No.35 Tsinghua East Road, Haidian District 100083, P. R. China*

### TABLE OF CONTENTS

|                                                                       |    |
|-----------------------------------------------------------------------|----|
| Transmission electron microscope image of cellulose nanocrystal ..... | S2 |
|-----------------------------------------------------------------------|----|

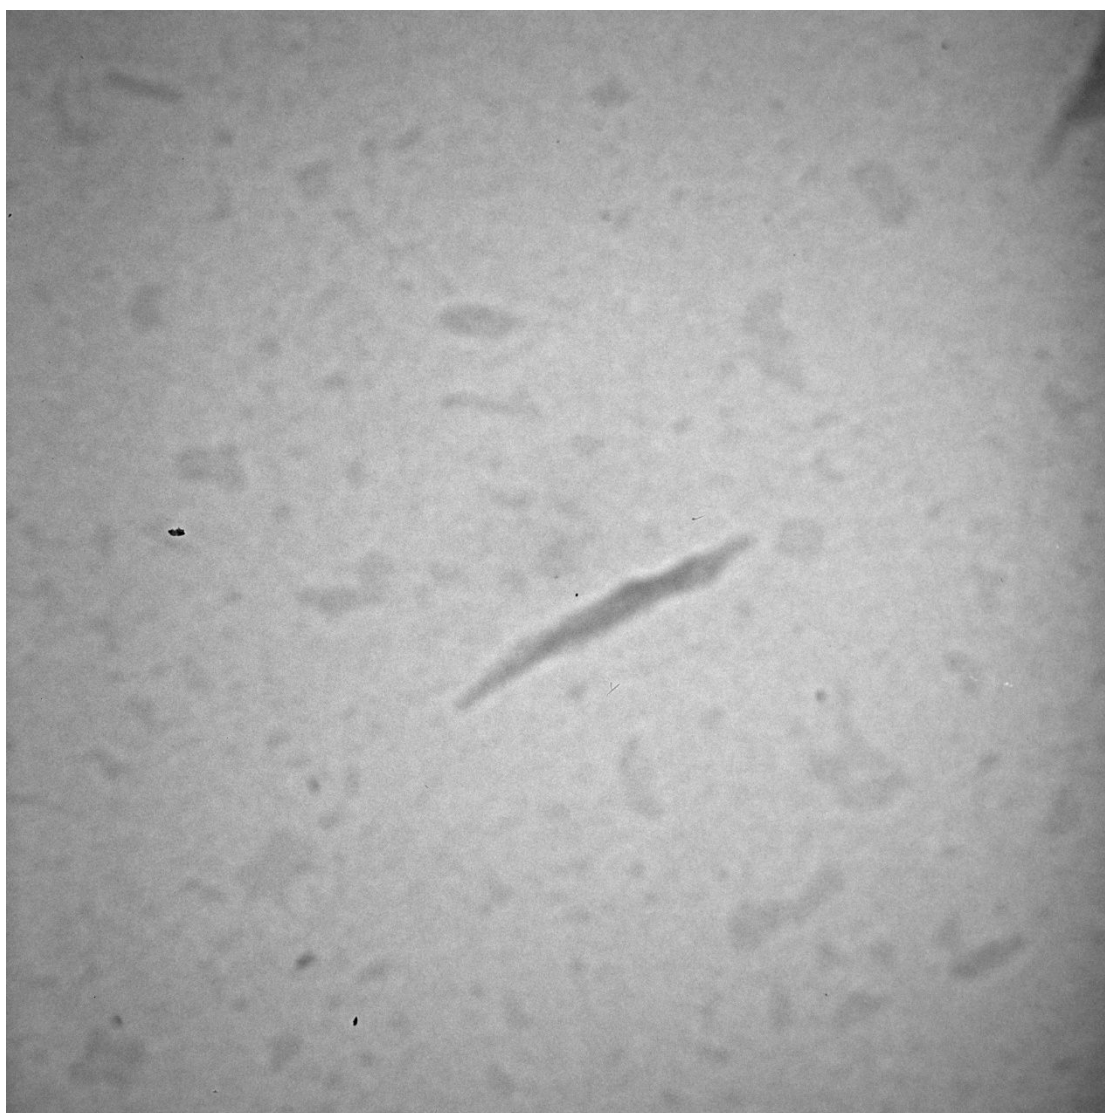

cnc8.tif

Print Mag: 119000x @ 7.0 in

TEM Mode: Imaging

100 nm

HV=75.0kV

Direct Mag: 100000x

Tilt:

AMT Camera System

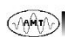

**Figure S1.** Transmission electron microscope image of cellulose nanocrystal
